# Supplementary material
Source: publisher figshare collection journal article supplement (https://acs.figshare.com/ndownloader/files/5760957)
Supplement: Supplementary file 1 [file 5760957]

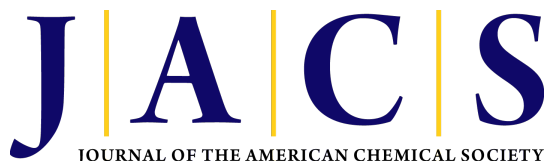

JOURNAL OF THE AMERICAN CHEMICAL SOCIETY

J. Am. Chem. Soc., 1998, 120(38), 9959-9960, DOI:[10.1021/ja981798d](https://doi.org/10.1021/ja981798d)

#### Terms & Conditions

Electronic Supporting Information files are available without a subscription to ACS Web Editions. The American Chemical Society holds a copyright ownership interest in any copyrightable Supporting Information. Files available from the ACS website may be downloaded for personal use only. Users are not otherwise permitted to reproduce, republish, redistribute, or sell any Supporting Information from the ACS website, either in whole or in part, in either machine-readable form or any other form without permission from the American Chemical Society. For permission to reproduce, republish and redistribute this material, requesters must process their own requests via the RightsLink permission system. Information about how to use the RightsLink permission system can be found at <http://pubs.acs.org/page/copyright/permissions.html>

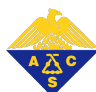

ACS Publications

MOST TRUSTED. MOST CITED. MOST READ.

Copyright © 1998 American Chemical Society

REVISED

**Supporting Information for:**

**A Molecular Precursor Route to Active and Selective Vanadia-Silica-Zirconia  
Heterogeneous Catalysts for the Oxidative Dehydrogenation of Propane**

Ron Rulkens and T. Don Tilley\*

AUG 05 1998

Contribution from the Department of Chemistry, University of California, Berkeley, Berkeley, California 94720-1460, and the Chemical Sciences Division, Lawrence Berkeley Laboratory, 1 Cyclotron Road, Berkeley, California 94720

**Synthesis of  $\text{OV}[\text{OSi}(\text{O}^t\text{Bu})_3]_3$ .** At room temperature, 1.156 g of  $\text{OVCl}_3$  (0.067 mol) was added rapidly to a vigorously stirred solution of 1.7 mL of pyridine and 5.28 g of  $\text{HOSi}(\text{O}^t\text{Bu})_3$  in 75 mL of benzene. Stirring was continued for 24 h, after which the pyridinium hydrochloride was removed by filtration and washed with 50 mL of hexanes. After removal of the volatile material from the combined extracts, 5.25 g of  $\text{OV}[\text{OSi}(\text{O}^t\text{Bu})_3]_3$  (92%) was obtained as a pure, white crystalline powder. The compound thus isolated may contain small amounts of  $\text{HOSi}(\text{O}^t\text{Bu})_3$  as an impurity. Further purification by recrystallization from 20 mL of  $\text{CH}_2\text{Cl}_2$  at  $-40^\circ\text{C}$  resulted in isolation of 4.85 g of analytically pure  $\text{OV}[\text{OSi}(\text{O}^t\text{Bu})_3]_3$  (85% yield). Anal. Calcd for  $\text{C}_{36}\text{H}_{81}\text{O}_{13}\text{SiV}$ : C, 50.44; H, 9.52. Found C, 50.58; H, 9.59.  $^1\text{H}$  NMR (300 MHz,  $\text{C}_6\text{D}_6$ ):  $\delta$  1.51 (s).  $^{13}\text{C}$  NMR (75.5 MHz,  $\text{C}_6\text{D}_6$ ):  $\delta$  31.89, 73.35.  $^{29}\text{Si}$  NMR (99.35 MHz,  $\text{C}_6\text{D}_6$ )  $\delta$  -98.  $^{51}\text{V}$  NMR (131.54 MHz,  $\text{C}_6\text{D}_6$ )  $\delta$  -777. UV-vis (hexanes) 253 nm,  $\epsilon$  9800. IR (Nujol, CsI) 2960 s, 2920 s, 2850 s, 1460 s, 1388 s, 1364 vs, 1242 s, 1212 w, 1190 vs, 1070 vs br, 1028 m sh, 1008 m sh, 910 vs br, 832 m, 806 w, 702 s, 670 w, 490 m, 470 m, 421 w, 378 w, 308 vw br. MS (EI, 40eV) 935 (0.5), 857 (0.3), 841 (0.2), 727 (2), 671 (7), 615 (15), 559 (35), 503 (54), 447 (86), 391 (100), 335 (50).

**Synthesis of V/Si/Zr/O xerogels.** A pyrex tube was charged with  $\text{OV}[\text{OSi}(\text{O}^t\text{Bu})_3]_3$ ,  $\text{Zr}(\text{OCMe}_2\text{Et})_4$ , and octane (ca. 10 mL for each 1.5 g of precursor mixture) in the ratios given in Table

1, and the tube was then flame-sealed under vacuum. The resulting solution was heated at 175 °C for 48 h to yield a gel (except for the homothermolysis of  $\text{OV}[\text{OSi}(\text{O}^t\text{Bu})_3]_3$ , which was heated at 180 °C for 120 h). The xerogels were obtained by air-drying for 3-7 days. Before catalysis, the materials were calcined under a gentle flow of oxygen at 500 °C for 3 h.

**Catalysis.** Selectivity and conversion measurements were carried out in a fixed-bed quartz reactor using 0.025-0.100 g of catalyst mixed with 0.500 g of quartz chips. The reactions were carried out at under ambient pressure with a feed ratio  $\text{O}_2/\text{C}_3\text{H}_8/\text{He}$  of 8:25:200.  $\text{C}_3\text{H}_8$  conversion was varied by changing the flow rate between 30 and 233  $\text{mL h}^{-1}$ . On-line analysis of reactants and products was performed using a Hewlett-Packard 5880 gas chromatograph equipped with a carboxen column. Only  $\text{C}_3\text{H}_6$ ,  $\text{H}_2\text{O}$ ,  $\text{CO}$  and  $\text{CO}_2$  were detected as reaction products. Exact catalyst amounts used: 25, 32, 25, 32, 45, 85, 100 mg for V/Si/Zr/O catalysts containing 33, 23, 18, 14, 10, 5 and 2 %  $\text{V}_2\text{O}_5$  respectively, 60 mg for the catalyst from ref. 27, and 25 mg for the reference V/Si/Zr/O catalyst made by wet impregnation with  $\text{NH}_4(\text{VO}_3)$  and oxalic acid.

**Table 2.** Comparison of the best catalytic systems for propane ODH. Data from different references should be compared with caution, since they were typically obtained under different reaction conditions (flow rates, reactor design, etc.).

|                                                                                      | Activity<br>[mmol·g <sup>-1</sup> h <sup>-1</sup> ] | Activity<br>[mmol·m <sup>-2</sup> h <sup>-1</sup> ] | Selectivity<br>[% C <sub>3</sub> H <sub>6</sub> ] | Conversion<br>[% C <sub>3</sub> H <sub>8</sub> ] | T<br>[°C] | Reference |
|--------------------------------------------------------------------------------------|-----------------------------------------------------|-----------------------------------------------------|---------------------------------------------------|--------------------------------------------------|-----------|-----------|
| Mg/V/O                                                                               | 1.82                                                | 0.22                                                | 62                                                | 20                                               | 500       | 6,9       |
| Nb/V/O                                                                               | 0.89                                                | 0.3                                                 | 70                                                | 10                                               | 394       | 10        |
| V-silicalite                                                                         | 1                                                   | 0.0022                                              | 51                                                | 22                                               | 500       | 6,12      |
| β-NiMoO <sub>4</sub>                                                                 | 5.6                                                 | 0.75                                                | 78                                                | 7                                                | 500       | 11        |
| MgMoO <sub>4</sub>                                                                   | 0.50                                                | 0.172                                               | 61                                                | 16                                               | 500       | 7         |
| CoMoO <sub>4</sub>                                                                   | 0.63                                                | 0.068                                               | 89 (61)                                           | 5 (20)                                           | 450       | 7         |
| V <sub>2</sub> O <sub>5</sub> /ZrO <sub>2</sub><br>10% V <sub>2</sub> O <sub>5</sub> | 58                                                  | 0.48                                                | 43                                                | 10                                               | 500       | 28        |
| V/Si/Zr/O<br>14% V <sub>2</sub> O <sub>5</sub>                                       | 100                                                 | 0.21                                                | 77                                                | 6                                                | 500       | this work |
| V/Si/Zr/O<br>18% V <sub>2</sub> O <sub>5</sub>                                       | 78                                                  | 0.27                                                | 87                                                | 4                                                | 500       | this work |

**Figure 3.** Diffuse Reflectance UV-vis spectra for V/Si/Zr/O catalysts with different vanadia contents.

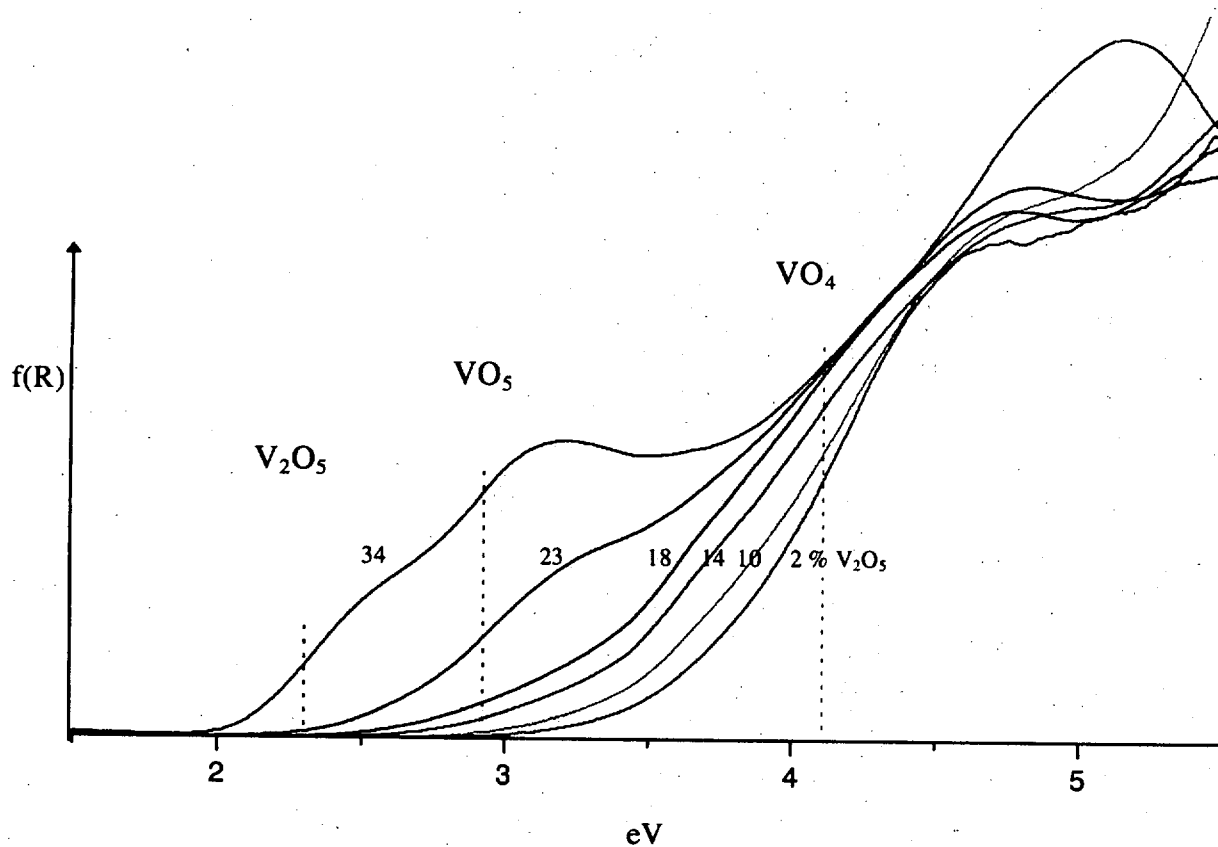

**Figure 4** FT-IR of V/Si/Zr/O catalysts

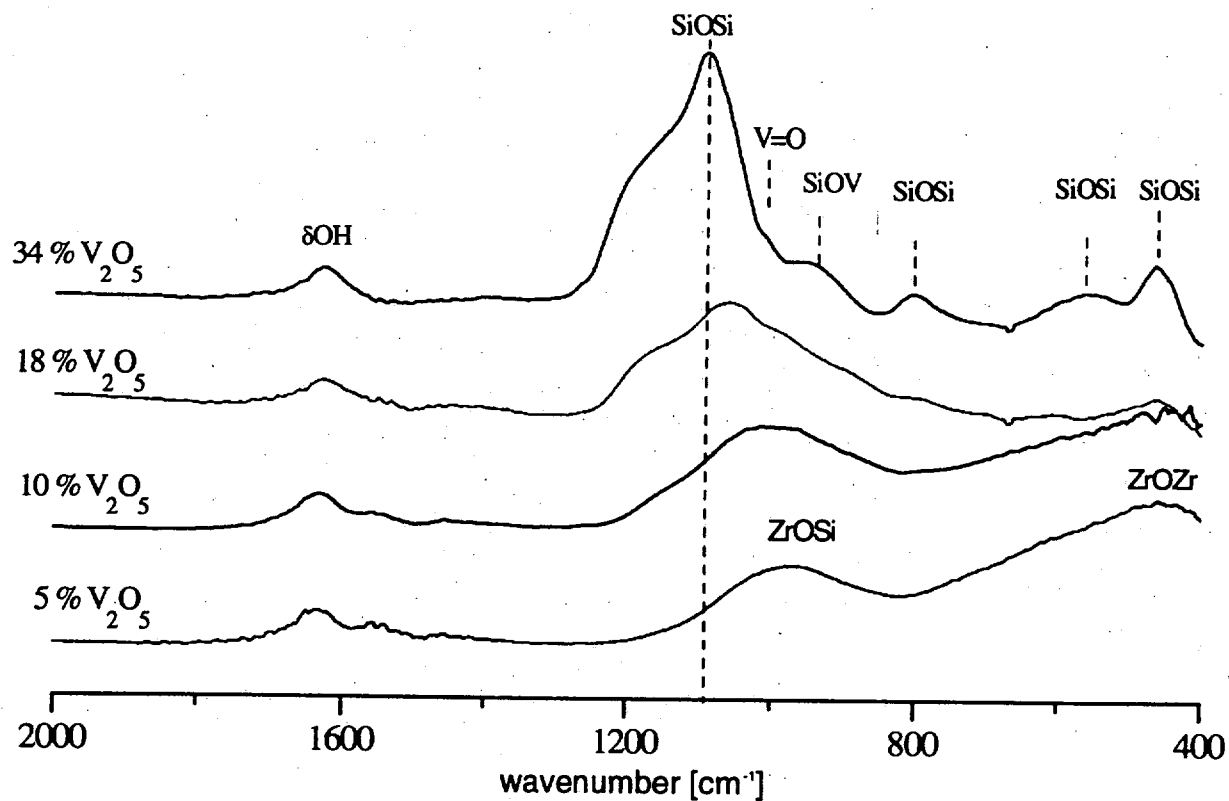

**Figure 5.** Solid-State MAS  $^{29}\text{Si}$  NMR spectra of V/Si/Zr/O xerogels.

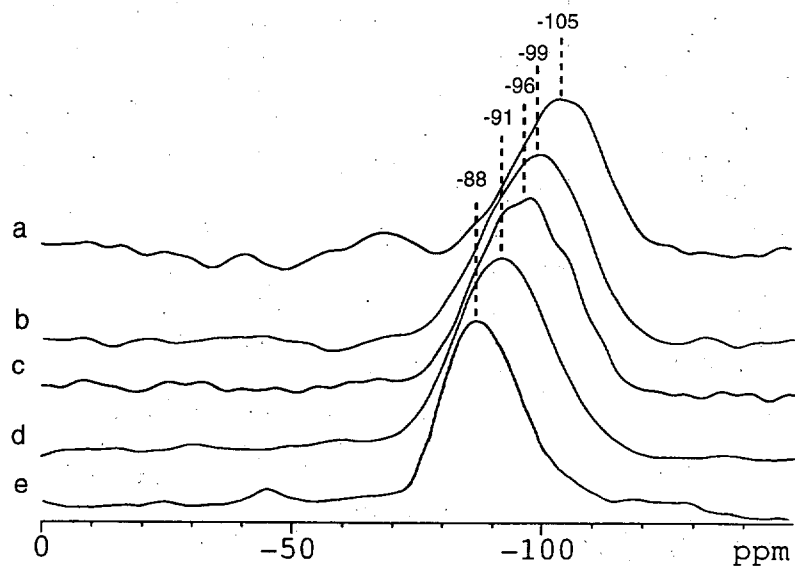

a 46%  $\text{SiO}_2$ , 23%  $\text{V}_2\text{O}_5$ , 31%  $\text{ZrO}_2$ ,  $\delta = -104$  ppm

b 36%  $\text{SiO}_2$ , 18%  $\text{V}_2\text{O}_5$ , 46%  $\text{ZrO}_2$ ,  $\delta = -99$  ppm

c 28%  $\text{SiO}_2$ , 14%  $\text{V}_2\text{O}_5$ , 58%  $\text{ZrO}_2$ ,  $\delta = -96$  ppm

d 20%  $\text{SiO}_2$ , 10%  $\text{V}_2\text{O}_5$ , 70%  $\text{ZrO}_2$ ,  $\delta = -91$  ppm

e 10%  $\text{SiO}_2$ , 5%  $\text{V}_2\text{O}_5$ , 85%  $\text{ZrO}_2$ ,  $\delta = -104$  ppm
